# Supplementary material
Source: MDPI journal article supplement (https://www.mdpi.com/2311-7524/9/3/296)
Supplement: s1 [file s1]

## Supplementary Figures

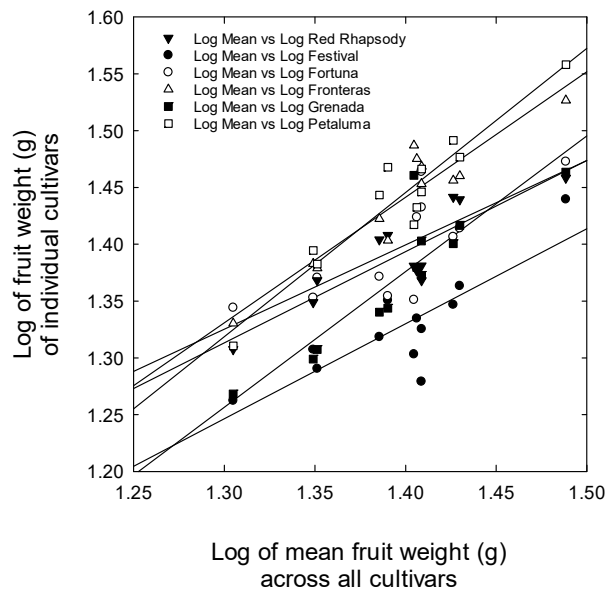

**Figure S1.** Regression analysis used to estimate the stability of fruit weight in six strawberry cultivars in Queensland. Individual cultivar values were plotted against the mean of the cultivars in a specific harvest following Finlay and Wilkinson [5].

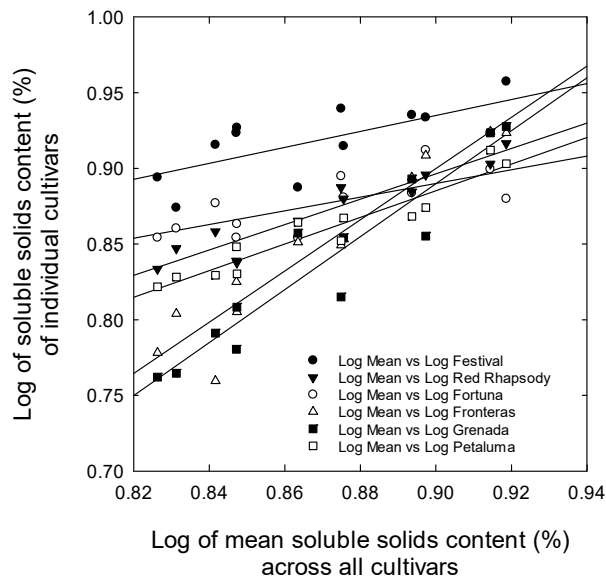

**Figure S2.** Regression analysis used to estimate the stability of fruit soluble solids content (SSC) in six strawberry cultivars in Queensland. Individual cultivar values were plotted against the mean of the cultivars in a specific harvest following Finlay and Wilkinson [5].

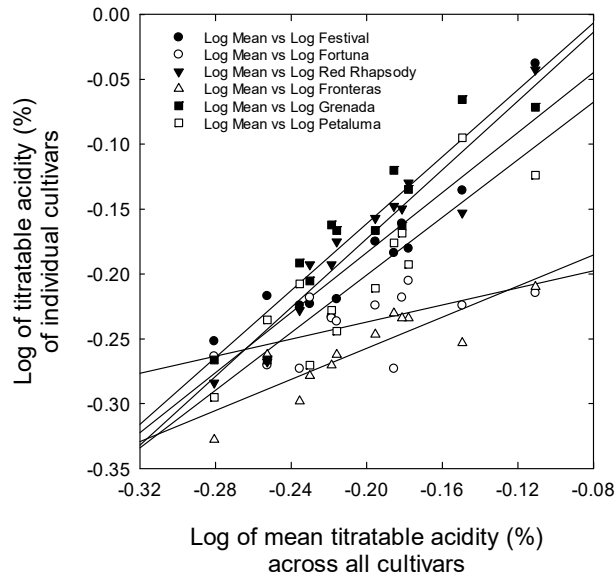

**Figure S3.** Regression analysis used to estimate the stability of fruit titratable acidity (TA) in six strawberry cultivars in Queensland. Individual cultivar values were plotted against the mean of the cultivars in a specific harvest following Finlay and Wilkinson [5].
